# Supplementary material for: Long noncoding RNA LINC01111 suppresses pancreatic cancer aggressiveness by regulating DUSP1 expression via microRNA-3924
Source: PubMed Central journal article supplement (PMC6877515; doi:10.1038/s41419-019-2123-y), 2019-11-25
Supplement: 41419_2019_2123_MOESM2_ESM.pdf [file 41419_2019_2123_MOESM2_ESM.pdf]

Please complete the table below to indicate the contributions of all named authors to the figures.

Figure 1:

|  |
|--|
|  |
|--|

Figure 2:

|  |
|--|
|  |
|--|

Figure 3:

|  |
|--|
|  |
|--|

Figure 4:

|  |
|--|
|  |
|--|

Figure 5:

|  |
|--|
|  |
|--|

Figure 6:

|  |
|--|
|  |
|--|

Signed for and on behalf of the Author(s):

|  |
|--|
|  |
|--|

Print Name:

|  |
|--|
|  |
|--|

Date:

|  |
|--|
|  |
|--|
